# Supplementary material
Source: PubMed Central journal article supplement (PMC7240636)
Supplement: jamapsychiatry-77-830-s001.pdf [file jamapsychiatry-77-830-s001.pdf]

## Supplementary Online Content

Harris MG, Kazdin AE, Chiu WT, et al; WHO World Mental Health Survey Collaborators. Findings from World Mental Health surveys of the perceived helpfulness of treatment for patients with major depressive disorder. *JAMA Psychiatry*. Published online May 20, 2020. doi:10.1001/jamapsychiatry.2020.1107

**eTable 1.** World Mental Health Survey Sample Characteristics by World Bank Income Categories

**eTable 2.** Conditional and Cumulative Probabilities of Depression Treatment Being Perceived as Helpful After Each Professional Seen, Among Respondents With Lifetime *DSM-IV* Major Depressive Disorder Who Obtained Treatment

**eTable 3.** Conditional and Cumulative Probability of Persistence With Treatment After Previous Unhelpful Attempts, Among Respondents With Lifetime *DSM-IV* Major Depressive Disorder Who Obtained Treatment

**eTable 4.** Interaction Between Main Effects and Country Income Group to Predict Helpful Treatment and Persistence (Pooled Across Professionals Seen) and Perceived Helpfulness of Treatment (Person Level), Among People With Lifetime *DSM-IV* Major Depressive Disorder Who Obtained Treatment

This supplementary material has been provided by the authors to give readers additional information about their work.

**eTable 1. World Mental Health Survey Sample Characteristics by World Bank Income Categories<sup>a</sup>**

| Country by income category               | Survey <sup>b</sup> | Sample characteristics <sup>c</sup>                                                                                                                    | Field dates | Age range | Sample size |          |                                   | Response rate <sup>e</sup> |
|------------------------------------------|---------------------|--------------------------------------------------------------------------------------------------------------------------------------------------------|-------------|-----------|-------------|----------|-----------------------------------|----------------------------|
|                                          |                     |                                                                                                                                                        |             |           | Part I      | Part II  | Part II and age ≤ 44 <sup>d</sup> |                            |
| <b>I. Low/middle-income countries</b>    |                     |                                                                                                                                                        |             |           |             |          |                                   |                            |
| Brazil - São Paulo                       | São Paulo Megacity  | São Paulo metropolitan area.                                                                                                                           | 2005-8      | 18-93     | 5,037       | 2,942    | --                                | 81.3                       |
| Bulgaria                                 | NSHS                | Nationally representative.                                                                                                                             | 2002-6      | 18-98     | 5,318       | 2,233    | 741                               | 72.0                       |
| Bulgaria 2                               | NSHS - 2            | Nationally representative.                                                                                                                             | 2016-17     | 18-91     | 1,508       | 578      | --                                | 61.0                       |
| Colombia - Medellin                      | MMHHS               | Medellin metropolitan area.                                                                                                                            | 2011-12     | 19-65     | 3,261       | 1,673    | --                                | 97.2                       |
| Iraq                                     | IMHS                | Nationally representative.                                                                                                                             | 2006-7      | 18-96     | 4,332       | 4,332    | --                                | 95.2                       |
| Lebanon                                  | LEBANON             | Nationally representative.                                                                                                                             | 2002-3      | 18-94     | 2,857       | 1,031    | 595                               | 70.0                       |
| Nigeria                                  | NSMHW               | 21 of the 36 states in the country, representing 57% of the national population. The surveys were conducted in Yoruba, Igbo, Hausa and Efik languages. | 2002-4      | 18-100    | 6,752       | 2,143    | 1,203                             | 79.3                       |
| PRC <sup>f</sup> - Shenzhen <sup>g</sup> | Shenzhen            | Shenzhen metropolitan area. Included temporary residents as well as household residents.                                                               | 2005-7      | 18-88     | 7,132       | 2,475    | --                                | 80.0                       |
| Romania                                  | RMHS                | Nationally representative.                                                                                                                             | 2005-6      | 18-96     | 2,357       | 2,357    | --                                | 70.9                       |
| <b>TOTAL</b>                             |                     |                                                                                                                                                        |             |           | (38,554)    | (19,764) | (2,539)                           | 79.0                       |
| <b>II. High-income countries</b>         |                     |                                                                                                                                                        |             |           |             |          |                                   |                            |
| Argentina                                | AMHES               | Eight largest urban areas of the country (approximately 50% of the total national population)                                                          | 2015        | 18-98     | 3,927       | 2,116    | --                                | 77.3                       |
| Australia <sup>g</sup>                   | NSMHWB              | Nationally representative.                                                                                                                             | 2007        | 18-85     | 8,463       | 8,463    | --                                | 60.0                       |
| Israel                                   | NHS                 | Nationally representative.                                                                                                                             | 2003-4      | 21-98     | 4,859       | 4,859    | --                                | 72.6                       |
| Northern Ireland                         | NISHS               | Nationally representative.                                                                                                                             | 2005-8      | 18-97     | 4,340       | 1,986    | --                                | 68.4                       |
| Poland                                   | EZOP                | Nationally representative                                                                                                                              | 2010-11     | 18-65     | 10,081      | 4,000    | 2,276                             | 50.4                       |
| Portugal                                 | NMHS                | Nationally representative.                                                                                                                             | 2008-9      | 18-81     | 3,849       | 2,060    | 1,070                             | 57.3                       |
| Saudi Arabia <sup>g</sup>                | SNMHS               | Nationally representative                                                                                                                              | 2013-16     | 18-65     | 3,638       | 1,793    | --                                | 61.0                       |
| Spain - Murcia                           | PEGASUS Murcia      | Murcia region. Regionally representative.                                                                                                              | 2010-12     | 18-96     | 2,621       | 1,459    | --                                | 67.4                       |
| <b>TOTAL</b>                             |                     |                                                                                                                                                        |             |           | (41,778)    | (26,736) | (3,346)                           | 60.7                       |
| <b>III. TOTAL</b>                        |                     |                                                                                                                                                        |             |           | (80,332)    | (46,500) | (5,885)                           | 68.3                       |

<sup>a</sup> The World Bank (2012) Data. Accessed May 12, 2012 at: <http://data.worldbank.org/country>. Some of the World Mental Health survey countries have moved into new income categories since the surveys were conducted. The income groupings above reflect the status of each country at the time of data collection. The current income category of each country is available at the preceding URL.

<sup>b</sup> NSHS (Bulgaria National Survey of Health and Stress); MMHHS (Medellin Mental Health Household Study); IMHS (Iraq Mental Health Survey); LEBANON (Lebanese Evaluation of the Burden of Ailments and Needs of the Nation); NSMHW (The Nigerian Survey of Mental Health and Wellbeing); RMHS (Romania Mental Health Survey); AMHES (Argentina Mental Health Epidemiologic Survey); NSMHWB (National Survey of Mental Health and Wellbeing); NHS (Israel National Health Survey); NISHS (Northern Ireland Study of Health and Stress); EZOP (Epidemiology of Mental Disorders and Access to Care Survey); NMHS (Portugal National Mental Health Survey); SNMHS (Saudi National Mental Health Survey); PEGASUS-Murcia (Psychiatric Enquiry to General Population in Southeast Spain-Murcia).

<sup>c</sup> Most World Mental Health surveys are based on stratified multistage clustered area probability household samples in which samples of areas equivalent to counties or municipalities in the US were selected in the first stage followed by one or more subsequent stages of geographic sampling (e.g. towns within counties,

blocks within towns, households within blocks) to arrive at a sample of households, in each of which a listing of household members was created and one or two people were selected from this listing to be interviewed. No substitution was allowed when the originally sampled household resident could not be interviewed. These household samples were selected from Census area data. Some WMH surveys (Poland, Spain-Murcia) used municipal, country resident or universal health-care registries to select respondents without listing households. 11 of the 17 surveys are based on nationally representative household samples.

<sup>d</sup> Argentina, Australia, Brazil, Bulgaria 2 (2016-17), Colombia-Medellin, Iraq, Israel, Northern Ireland, PRC-Shenzhen, Romania, Saudi Arabia and Spain-Murcia did not have an age restricted Part 2 sample. All other countries, with the exception of Nigeria (which was age restricted to  $\leq 39$ ) were age restricted to  $\leq 44$ .

<sup>e</sup> The response rate is calculated as the ratio of the number of households in which an interview was completed to the number of households originally sampled, excluding from the denominator households known not to be eligible either because of being vacant at the time of initial contact or because the residents were unable to speak the designated languages of the survey. The weighted average response rate is 68.3%.

<sup>f</sup> People's Republic of China

<sup>g</sup> For the purposes of cross-national comparisons we limited the sample to those 18+.

**eTable 2. Conditional and Cumulative Probabilities of Depression Treatment Being Perceived as Helpful After Each Professional Seen, Among Respondents With Lifetime *DSM-IV* Major Depressive Disorder Who Obtained Treatment**

|                                                                   | I. Conditional probabilities |        |         |                       |        |         |                             |        |       | II. Cumulative probabilities |       |                                 |       |                                     |       |
|-------------------------------------------------------------------|------------------------------|--------|---------|-----------------------|--------|---------|-----------------------------|--------|-------|------------------------------|-------|---------------------------------|-------|-------------------------------------|-------|
|                                                                   | All                          |        |         | High-income countries |        |         | Low/middle-income countries |        |       | All (n=2,726)                |       | High-income countries (n=2,082) |       | Low/middle-income countries (n=664) |       |
|                                                                   | %                            | (SE)   | (n)     | %                     | (SE)   | (n)     | %                           | (SE)   | (n)   | %                            | (SE)  | %                               | (SE)  | %                                   | (SE)  |
| Treatment perceived as helpful after number of professionals seen |                              |        |         |                       |        |         |                             |        |       |                              |       |                                 |       |                                     |       |
| 1                                                                 | 30.6                         | (0.9)  | (2,726) | 31.1                  | (1.0)  | (2,082) | 29.0                        | (2.1)  | (644) | 30.6                         | (0.9) | 31.1                            | (1.0) | 29.0                                | (2.1) |
| 2                                                                 | 39.6                         | (1.7)  | (1,396) | 39.3                  | (1.8)  | (1,101) | 40.8                        | (4.0)  | (295) | 58.1                         | (1.3) | 58.2                            | (1.5) | 58.0                                | (3.2) |
| 3                                                                 | 37.4                         | (2.5)  | (648)   | 36.6                  | (2.9)  | (507)   | 40.2                        | (4.9)  | (141) | 73.8                         | (1.4) | 73.5                            | (1.6) | 74.9                                | (2.7) |
| 4                                                                 | 32.1                         | (3.2)  | (332)   | 32.6                  | (3.6)  | (266)   | 30.4                        | (6.7)  | (66)  | 82.2                         | (1.3) | 82.1                            | (1.6) | 82.5                                | (2.6) |
| 5                                                                 | 26.3                         | (3.6)  | (186)   | 28.7                  | (4.4)  | (152)   | 16.4                        | (4.8)  | (34)  | 86.9                         | (1.2) | 87.2                            | (1.4) | 85.4                                | (2.6) |
| 6                                                                 | 16.8                         | (5.2)  | (103)   | 19.7                  | (6.4)  | (86)    | 4.9                         | (3.5)  | (17)  | 89.1                         | (1.2) | 89.8                            | (1.4) | 86.1                                | (2.6) |
| 7                                                                 | 5.1                          | (2.4)  | (73)    | 6.5                   | (3.1)  | (61)    | 0.0                         | (0.0)  | (12)  | 89.6                         | (1.2) | 90.4                            | (1.4) | -                                   |       |
| 8                                                                 | 19.6                         | (8.4)  | (63)    | 22.0                  | (9.7)  | (54)    | 5.1                         | (5.1)  | (9)   | 91.7                         | (1.2) | 92.5                            | (1.3) | 86.8                                | (2.6) |
| 9                                                                 | 6.9                          | (4.0)  | (49)    | 5.5                   | (4.0)  | (41)    | 12.9                        | (11.7) | (8)   | 92.3                         | (1.2) | 92.9                            | (1.3) | 88.5                                | (2.7) |
| 10                                                                | 21.7                         | (6.7)  | (44)    | 25.9                  | (8.4)  | (37)    | 3.1                         | (3.2)  | (7)   | 93.9                         | (1.2) | 94.8                            | (1.3) | 88.9                                | (2.7) |
| 11                                                                | 37.8                         | (11.4) | (16)    | 4.1                   | (4.2)  | (12)    | 94.3                        | (1.8)  | (4)   | 96.2                         | (1.1) | 95.0                            | (1.3) | 99.4                                | (0.6) |
| 12                                                                | 22.8                         | (12.2) | (11)    | 23.7                  | (12.9) | (10)    | 0.0                         | (0.0)  | (1)   | 97.1                         | (1.1) | 96.2                            | (1.3) | -                                   |       |
| 13                                                                | 0.0                          | (0.0)  | (7)     | 0.0                   | (0.0)  | (6)     | 0.0                         | (0.0)  | (1)   | -                            |       | -                               |       | -                                   |       |
| 14                                                                | 0.0                          | (0.0)  | (7)     | 0.0                   | (0.0)  | (6)     | 0.0                         | (0.0)  | (1)   | -                            |       | -                               |       | -                                   |       |
| 15                                                                | 37.8                         | (21.9) | (7)     | 39.6                  | (23.2) | (6)     | 0.0                         | (0.0)  | (1)   | 98.2                         | (1.0) | 97.7                            | (1.3) | -                                   |       |
| 16                                                                | 0.0                          | (0.0)  | (4)     | 0.0                   | (0.0)  | (3)     | 0.0                         | (0.0)  | (1)   | -                            |       | -                               |       | -                                   |       |
| 17                                                                | 0.0                          | (0.0)  | (4)     | 0.0                   | (0.0)  | (3)     | 0.0                         | (0.0)  | (1)   | -                            |       | -                               |       | -                                   |       |
| 18                                                                | 49.3                         | (30.0) | (3)     | 60.0                  | (34.2) | (2)     | 0.0                         | (0.0)  | (1)   | 99.1                         | (0.7) | 99.1                            | (0.9) | -                                   |       |
| 19                                                                | 0.0                          | (0.0)  | (2)     | 0.0                   | (0.0)  | (1)     | 0.0                         | (0.0)  | (1)   | -                            |       | -                               |       | -                                   |       |
| 20                                                                | 64.8                         | (22.8) | (2)     | 100.0                 | (0.0)  | (1)     | 0.0                         | (0.0)  | (1)   | 99.7                         | (0.3) | 100.0                           | (0.0) | -                                   |       |
| 21                                                                | 0.0                          | (0.0)  | (1)     | -                     |        | -       | 0.0                         | (0.0)  | (1)   | -                            |       | -                               |       | -                                   |       |
| 22                                                                | 0.0                          | (0.0)  | (1)     | -                     |        | -       | 0.0                         | (0.0)  | (1)   | -                            |       | -                               |       | -                                   |       |

|    |     |       |     |  |   |   |  |     |       |     |  |   |  |   |  |   |
|----|-----|-------|-----|--|---|---|--|-----|-------|-----|--|---|--|---|--|---|
| 23 | 0.0 | (0.0) | (1) |  | - | - |  | 0.0 | (0.0) | (1) |  | - |  | - |  | - |
| 24 | 0.0 | (0.0) | (1) |  | - | - |  | 0.0 | (0.0) | (1) |  | - |  | - |  | - |
| 25 | 0.0 | (0.0) | (1) |  | - | - |  | 0.0 | (0.0) | (1) |  | - |  | - |  | - |

Abbreviations: SE, standard error.

**eTable 3. Conditional and Cumulative Probability of Persistence With Treatment After Previous Unhelpful Attempts, Among Respondents With Lifetime *DSM-IV* Major Depressive Disorder Who Obtained Treatment**

|                                                             | I. Conditional probabilities |        |         |                       |        |         |                             |        |       | II. Cumulative probabilities |       |                                 |       |                                     |       |
|-------------------------------------------------------------|------------------------------|--------|---------|-----------------------|--------|---------|-----------------------------|--------|-------|------------------------------|-------|---------------------------------|-------|-------------------------------------|-------|
|                                                             | All                          |        |         | High-income countries |        |         | Low/middle-income countries |        |       | All (n=1,868)                |       | High-income countries (n=1,424) |       | Low/middle-income countries (n=444) |       |
|                                                             | %                            | (SE)   | (n)     | %                     | (SE)   | (n)     | %                           | (SE)   | (n)   | %                            | (SE)  | %                               | (SE)  | %                                   | (SE)  |
| Saw the next professional if not helped by the previous one |                              |        |         |                       |        |         |                             |        |       |                              |       |                                 |       |                                     |       |
| 2                                                           | 74.4                         | (1.2)  | (1,868) | 77.2                  | (1.4)  | (1,424) | 66.2                        | (2.1)  | (444) | 74.4                         | (1.2) | 77.2                            | (1.4) | 66.2                                | (2.1) |
| 3                                                           | 76.4                         | (1.9)  | (838)   | 75.7                  | (2.2)  | (654)   | 78.9                        | (3.4)  | (184) | 56.9                         | (1.7) | 58.4                            | (2.0) | 52.3                                | (3.5) |
| 4                                                           | 83.3                         | (1.9)  | (402)   | 85.4                  | (2.2)  | (312)   | 75.5                        | (4.3)  | (90)  | 47.4                         | (1.9) | 49.9                            | (2.2) | 39.5                                | (3.9) |
| 5                                                           | 83.1                         | (2.9)  | (224)   | 83.8                  | (3.4)  | (180)   | 80.3                        | (4.6)  | (44)  | 39.4                         | (2.2) | 41.9                            | (2.5) | 31.7                                | (4.2) |
| 6                                                           | 83.0                         | (3.2)  | (124)   | 85.3                  | (3.8)  | (102)   | 74.8                        | (6.2)  | (22)  | 32.7                         | (2.4) | 35.7                            | (2.7) | 23.7                                | (4.8) |
| 7                                                           | 87.8                         | (3.5)  | (84)    | 89.7                  | (3.3)  | (69)    | 81.2                        | (10.0) | (15)  | 28.7                         | (2.6) | 32.1                            | (3.0) | 19.3                                | (4.6) |
| 8                                                           | 88.0                         | (5.5)  | (68)    | 96.9                  | (2.2)  | (56)    | 56.3                        | (16.0) | (12)  | 25.3                         | (2.7) | 31.1                            | (3.1) | 10.8                                | (2.8) |
| 9                                                           | 87.9                         | (10.5) | (51)    | 85.6                  | (12.3) | (43)    | 100.0                       | (0.0)  | (8)   | 22.2                         | (3.0) | 26.6                            | (3.9) | -                                   |       |
| 10                                                          | 96.7                         | (2.4)  | (46)    | 96.0                  | (2.9)  | (39)    | 100.0                       | (0.0)  | (7)   | 21.5                         | (3.2) | 25.5                            | (4.3) | -                                   |       |
| 11                                                          | 48.6                         | (11.7) | (29)    | 39.3                  | (13.3) | (23)    | 80.5                        | (12.9) | (6)   | 10.4                         | (2.6) | 10.0                            | (3.5) | 8.7                                 | (2.5) |
| 12                                                          | 94.2                         | (5.8)  | (12)    | 94.0                  | (6.0)  | (11)    | 100.0                       | (0.0)  | (1)   | 9.8                          | (2.6) | 9.4                             | (3.5) | -                                   |       |
| 13                                                          | 100.0                        | (0.0)  | (7)     | 100.0                 | (0.0)  | (6)     | 100.0                       | (0.0)  | (1)   | -                            |       | -                               |       | -                                   |       |
| 14                                                          | 100.0                        | (0.0)  | (7)     | 100.0                 | (0.0)  | (6)     | 100.0                       | (0.0)  | (1)   | -                            |       | -                               |       | -                                   |       |
| 15                                                          | 100.0                        | (0.0)  | (7)     | 100.0                 | (0.0)  | (6)     | 100.0                       | (0.0)  | (1)   | -                            |       | -                               |       | -                                   |       |
| 16                                                          | 100.0                        | (0.0)  | (4)     | 100.0                 | (0.0)  | (3)     | 100.0                       | (0.0)  | (1)   | -                            |       | -                               |       | -                                   |       |
| 17                                                          | 100.0                        | (0.0)  | (4)     | 100.0                 | (0.0)  | (3)     | 100.0                       | (0.0)  | (1)   | -                            |       | -                               |       | -                                   |       |
| 18                                                          | 42.1                         | (28.3) | (4)     | 37.4                  | (28.8) | (3)     | 100.0                       | (0.0)  | (1)   | 4.1                          | (2.7) | 3.5                             | (2.6) | -                                   |       |
| 19                                                          | 100.0                        | (0.0)  | (2)     | 100.0                 | (0.0)  | (1)     | 100.0                       | (0.0)  | (1)   | -                            |       | -                               |       | -                                   |       |
| 20                                                          | 100.0                        | (0.0)  | (2)     | 100.0                 | (0.0)  | (1)     | 100.0                       | (0.0)  | (1)   | -                            |       | -                               |       | -                                   |       |
| 21                                                          | 100.0                        | (0.0)  | (1)     | -                     |        | -       | 100.0                       | (0.0)  | (1)   | -                            |       | -                               |       | -                                   |       |
| 22                                                          | 100.0                        | (0.0)  | (1)     | -                     |        | -       | 100.0                       | (0.0)  | (1)   | -                            |       | -                               |       | -                                   |       |

|    |       |       |     |  |   |   |       |       |     |  |   |  |   |  |
|----|-------|-------|-----|--|---|---|-------|-------|-----|--|---|--|---|--|
| 23 | 100.0 | (0.0) | (1) |  | - | - | 100.0 | (0.0) | (1) |  | - |  | - |  |
| 24 | 100.0 | (0.0) | (1) |  | - | - | 100.0 | (0.0) | (1) |  | - |  | - |  |
| 25 | 100.0 | (0.0) | (1) |  | - | - | 100.0 | (0.0) | (1) |  | - |  | - |  |

Abbreviations: SE, standard error.

**eTable 4. Interaction Between Main Effects and Country Income Group to Predict Helpful Treatment and Persistence (Pooled Across Professionals Seen) and Perceived Helpfulness of Treatment (Person Level), Among People With Lifetime *DSM-IV* Major Depressive Disorder Who Obtained Treatment**

| Interaction terms between each predictor and high income countries | Model 1:<br>Predicting helpful treatment<br>pooled across professionals seen |       |              |             | Model 2:<br>Predicting persistence<br>pooled across treatment failure |       |              |             | Model 3: Predicting perceived<br>helpfulness of treatment across<br>MDD patients |       |              |             |
|--------------------------------------------------------------------|------------------------------------------------------------------------------|-------|--------------|-------------|-----------------------------------------------------------------------|-------|--------------|-------------|----------------------------------------------------------------------------------|-------|--------------|-------------|
|                                                                    | Prevalence                                                                   |       | Multivariate |             | Prevalence                                                            |       | Multivariate |             | Prevalence                                                                       |       | Multivariate |             |
|                                                                    | Mean/%                                                                       | (SE)  | AOR          | (95% CI)    | Mean/%                                                                | (SE)  | AOR          | (95% CI)    | Mean/%                                                                           | (SE)  | AOR          | (95% CI)    |
| Age at first depression treatment                                  | 25.7                                                                         | (0.5) | 1.00         | (0.98-1.01) | 25.0                                                                  | (0.6) | 1.00         | (0.97-1.03) | 26.2                                                                             | (0.4) | 1.00         | (0.97-1.03) |
| $\chi^2_1$                                                         |                                                                              |       | 0.06         |             |                                                                       |       | 0.01         |             |                                                                                  |       | 0.01         |             |
| Female                                                             | 52.1                                                                         | (1.6) | 0.98         | (0.27-1.34) | 51.3                                                                  | (2.1) | 1.03         | (0.64-1.67) | 51.1                                                                             | (1.0) | 1.06         | (0.68-1.65) |
| Male                                                               | 25.2                                                                         | (1.7) | 1.00         |             | 25.8                                                                  | (2.1) | 1.00         |             | 24.5                                                                             | (1.0) | 1.00         |             |
| $\chi^2_1$                                                         |                                                                              |       | 0.01         |             |                                                                       |       | 0.01         |             |                                                                                  |       | 0.07         |             |
| Marital status                                                     |                                                                              |       |              |             |                                                                       |       |              |             |                                                                                  |       |              |             |
| Never married                                                      | 33.7                                                                         | (1.7) | 1.38         | (0.87-2.20) | 33.9                                                                  | (2.1) | 0.77         | (0.43-1.38) | 31.9                                                                             | (1.2) | 1.20         | (0.60-2.39) |
| Previously married                                                 | 12.9                                                                         | (1.1) | 1.16         | (0.77-1.73) | 13.4                                                                  | (1.4) | 1.27         | (0.65-2.48) | 12.3                                                                             | (0.8) | 1.49         | (0.79-2.81) |
| Currently married                                                  | 30.6                                                                         | (1.5) | 1.00         |             | 29.8                                                                  | (2.0) | 1.00         |             | 31.4                                                                             | (1.1) | 1.00         |             |
| $\chi^2_2$                                                         |                                                                              |       | 1.88         |             |                                                                       |       | 1.56         |             |                                                                                  |       | 1.56         |             |
| Education                                                          |                                                                              |       |              |             |                                                                       |       |              |             |                                                                                  |       |              |             |
| Low                                                                | 7.8                                                                          | (0.7) | 0.98         | (0.59-1.62) | 7.6                                                                   | (0.9) | 0.75         | (0.3-1.8)   | 8.4                                                                              | (0.6) | 0.98         | (0.48-2.99) |
| Low-average                                                        | 18.6                                                                         | (1.4) | 0.85         | (0.54-1.35) | 19.2                                                                  | (2.0) | 1.32         | (0.6-3.0)   | 17.3                                                                             | (0.8) | 1.12         | (0.53-2.36) |
| High-average                                                       | 27.6                                                                         | (1.5) | 1.31         | (0.88-1.96) | 26.9                                                                  | (1.9) | 1.37         | (0.7-2.8)   | 28.5                                                                             | (1.1) | 1.87         | (0.94-3.72) |
| High                                                               | 14.3                                                                         | (1.2) | 1.00         |             | 13.4                                                                  | (1.4) | 1.00         |             | 14.5                                                                             | (0.8) | 1.00         |             |
| Student                                                            | 9.1                                                                          | (1.0) | 0.72         | (0.38-1.36) | 9.9                                                                   | (1.2) | 1.01         | (0.36-2.86) | 7.0                                                                              | (0.6) | 0.80         | (0.23-2.16) |
| $\chi^2_4$                                                         |                                                                              |       | 7.64         |             |                                                                       |       | 2.40         |             |                                                                                  |       | 6.93         |             |
| Treatment delay (years) <sup>a</sup>                               | 3.7                                                                          | (0.2) | 1.00         | (0.99-1.02) | 3.8                                                                   | (0.3) | 1.00         | (0.98-1.03) | 3.8                                                                              | (0.2) | 1.00         | (0.98-1.03) |
| $\chi^2_1$                                                         |                                                                              |       | 0.09         |             |                                                                       |       | 0.11         |             |                                                                                  |       | 0.14         |             |
| Started depression treatment $\geq$ 2000 (vs. 1990-1999)           | 41.3                                                                         | (1.6) | 1.06         | (0.76-1.47) | 38.2                                                                  | (1.9) | 1.42         | (0.81-2.47) | 46.1                                                                             | (1.1) | 1.56         | (0.95-2.56) |
| $\chi^2_1$                                                         |                                                                              |       | 0.10         |             |                                                                       |       | 1.5          |             |                                                                                  |       | 3.14         |             |
| Treatment type <sup>b</sup>                                        |                                                                              |       |              |             |                                                                       |       |              |             |                                                                                  |       |              |             |
| Mental health specialist + Psychotherapy                           | 33.3                                                                         | (1.6) | 0.68         | (0.41-1.14) | 32.9                                                                  | (1.8) | 0.58         | (0.27-1.22) | 32.6                                                                             | (1.3) | 0.48         | (0.22-1.04) |
| Mental health specialist + Medication                              | 45.4                                                                         | (1.7) | 1.04         | (0.58-1.87) | 45.4                                                                  | (2.1) | 1.47         | (0.70-3.10) | 37.4                                                                             | (1.2) | 1.73         | (0.78-3.82) |
| General medical                                                    | 58.5                                                                         | (1.6) | 0.74         | (0.49-1.12) | 59.7                                                                  | (1.9) | 0.71         | (0.39-1.28) | 54.3                                                                             | (1.2) | 0.57         | (0.30-1.10) |



**eTable 4 continued. Interaction between main effects and country income group to predict helpful treatment and persistence (pooled across professionals seen) and perceived helpfulness of treatment (person level), among people with lifetime *DSM-IV* major depressive disorder who obtained treatment**

| Interaction terms between each predictor and high-income countries | Model 1:<br>Predicting helpful treatment<br>pooled across professionals seen |       |              |             | Model 2:<br>Predicting persistence<br>pooled across treatment failure |       |              |             | Model 3: Predicting perceived<br>helpfulness of treatment across<br>MDD patients |       |              |             |
|--------------------------------------------------------------------|------------------------------------------------------------------------------|-------|--------------|-------------|-----------------------------------------------------------------------|-------|--------------|-------------|----------------------------------------------------------------------------------|-------|--------------|-------------|
|                                                                    | Prevalence                                                                   |       | Multivariate |             | Prevalence                                                            |       | Multivariate |             | Prevalence                                                                       |       | Multivariate |             |
|                                                                    | Mean/%                                                                       | (SE)  | AOR          | (95% CI)    | Mean/%                                                                | (SE)  | AOR          | (95% CI)    | Mean/%                                                                           | (SE)  | AOR          | (95% CI)    |
| Complementary/alternative medicine                                 | 16.0                                                                         | (1.6) | 0.50*        | (0.32-0.81) | 18.2                                                                  | (2.1) | 1.21         | (0.52-2.86) | 10.4                                                                             | (0.7) | 0.46         | (0.18-1.19) |
| Human services                                                     | 11.0                                                                         | (1.1) | 1.00         |             | 12.5                                                                  | (1.4) | 1.00         |             | 8.1                                                                              | (0.7) | 1.00         |             |
| $\chi^2_4$                                                         |                                                                              |       | 10.53*       |             |                                                                       |       | 4.04         |             |                                                                                  |       | 10.42*       |             |
| Exactly 2 or more of the above                                     | 51.2                                                                         | (1.7) | 1.13         | (0.60-2.12) | 53.1                                                                  | (2.1) | 1.06         | (0.42-2.68) | 42.0                                                                             | (1.1) | 1.06         | (0.41-2.77) |
| $\chi^2_1$                                                         |                                                                              |       | 0.14         |             |                                                                       |       | 0.01         |             |                                                                                  |       | 0.02         |             |
| $\chi^2_5$                                                         |                                                                              |       | 11.71*       |             |                                                                       |       | 4.18         |             |                                                                                  |       | 10.49        |             |
| Number of lifetime anxiety disorders <sup>c</sup>                  |                                                                              |       |              |             |                                                                       |       |              |             |                                                                                  |       |              |             |
| 2 or more lifetime anxiety disorders <sup>c</sup>                  | 18.6                                                                         | (1.3) | 1.15         | (0.73-1.80) | 19.3                                                                  | (1.6) | 1.37         | (0.67-2.79) | 15.3                                                                             | (0.9) | 1.66         | (0.87-3.17) |
| Exactly 1 lifetime anxiety disorder <sup>c</sup>                   | 23.2                                                                         | (1.3) | 1.18         | (0.83-1.68) | 23.6                                                                  | (1.6) | 0.77         | (0.43-1.35) | 22.3                                                                             | (1.0) | 1.04         | (0.62-1.74) |
| No lifetime anxiety disorder <sup>c</sup>                          | 35.5                                                                         | (1.7) | 1.00         |             | 34.3                                                                  | (2.2) | 1.00         |             | 38.1                                                                             | (1.2) | 1.00         |             |
| $\chi^2_2$                                                         |                                                                              |       | 0.98         |             |                                                                       |       | 2.49         |             |                                                                                  |       | 2.66         |             |
| Substance use disorder                                             |                                                                              |       |              |             |                                                                       |       |              |             |                                                                                  |       |              |             |
| Alcohol and/or drug abuse                                          | 14.8                                                                         | (1.3) | 0.94         | (0.50-1.75) | 16.2                                                                  | (1.7) | 0.66         | (0.26-1.66) | 11.7                                                                             | (0.8) | 0.68         | (0.30-1.55) |
| Alcohol or drug dependence but not abuse                           | 0.3                                                                          | (0.1) | 1.22         | (0.26-5.80) | 0.3                                                                   | (0.1) | 0.13         | (0.01-2.33) | 0.3                                                                              | (0.1) | 0.41         | (0.03-6.24) |
| $\chi^2_2$                                                         |                                                                              |       | 0.15         |             |                                                                       |       | 2.63         |             |                                                                                  |       | 1.38         |             |
| $\chi^2_4$                                                         |                                                                              |       | 1.11         |             |                                                                       |       | 5.34         |             |                                                                                  |       | 4.49         |             |
| Global $\chi^2_{19}$                                               |                                                                              |       | 27.27        |             |                                                                       |       | 22.52        |             |                                                                                  |       | 31.13*       |             |

Abbreviations: SE, standard error; AOR, adjusted odds ratio; CI, confidence interval; MDD, major depressive disorder.

\*Significant at .05 level, two-sided test.

<sup>a</sup> Treatment delay (years) = Age at first depression treatment – Age at onset of MDD.

<sup>b</sup> Treatment providers: mental health specialists (psychiatrist, psychiatric nurse, psychologist, psychiatric social worker, mental health counselor), primary care providers, human services providers (social worker or counselor in a social services agency, spiritual advisor), and complementary/alternative medicine (other type of healer or self-help group).

<sup>c</sup> Lifetime anxiety disorders included generalized anxiety disorder, panic disorder, agoraphobia with or without panic disorder, post-traumatic stress disorder, specific phobia, and social phobia.
